# Supplementary material for: Increasing of New CA-MRSA Infections Detected in people living with HIV Who Engage in Chemsex in Barcelona: An Ambispective Study
Source: Springer Nature journal article supplement (doi:10.1007/s40121-023-00846-6), 2023-07-26
Supplement: MOESM1 [file 25849652]

## **Increasing of new CA-MRSA infections detected in PLWH who engage in chemsex in Barcelona: An ambispective study**

Lorena DE LA MORA <sup>a</sup>, Cristina PITART <sup>b</sup>, Laura MORATA <sup>c</sup>, Ainoa UGARTE <sup>a</sup>, María MARTINEZ-REBOLLAR <sup>a</sup>, Elisa DE LAZZARI <sup>a</sup>, Andrea VERGARA <sup>b</sup>, Jordi BOSCH <sup>b</sup>, Ignasi Roca <sup>b</sup>, Maria Piquet <sup>b</sup>, Ana RODRIGUEZ <sup>a</sup>, Montserrat LAGUNO <sup>a</sup>, Juan AMBROSIONI <sup>a</sup>, Berta TORRES <sup>a</sup>, Ana GONZÁLEZ-CORDÓN <sup>a</sup>, Alexy INCIARTE <sup>a</sup>, Alberto FONCILLAS <sup>a</sup>, Josep RIERA <sup>d</sup>, Irene FUERTES <sup>d</sup>, Iván CHIVITE <sup>a</sup>, Esteban MARTINEZ <sup>a</sup>, José L. BLANCO <sup>a</sup>, Alex Soriano <sup>c</sup> and Josep MALLOLAS <sup>a</sup>

<sup>a</sup> HIV Unit, Infectious Diseases Service, Hospital Clinic, IDIBAPS, AIDS and HIV research group, University of Barcelona, Spain.

<sup>b</sup> Department of Clinical Microbiology, ISGlobal, Hospital Clínic—University of Barcelona, CIBERINF, Spain

<sup>c</sup> Department of Infectious Diseases, Hospital Clinic, IDIBAPS, CIBERINF, University of Barcelona, Spain

<sup>d</sup> Dermatology Service, Hospital Clinic, IDIBAPS, University of Barcelona Spain.

Correspondence to: Maria MARTINEZ-REBOLLAR. HIV Unit, Infectious Diseases Service, Hospital Clinic, IDIBAPS AIDS and HIV research group, Barcelona University, Spain. Villarroel 170, 08036, Barcelona, Spain. Phone number: +34 983 227 55 74. Fax number: +34 93 4515424. Email: [rebollar@clinic.cat](mailto:rebollar@clinic.cat)

Lorena De La Mora and Cristina Pitart contributed equally to the study. Alex Soriano and Josep Mallolas contributed equally to the study as co-senior authors. Maria Martínez-Rebollar is the corresponding author.

| <b>Table 2. Chemsex characterization</b> |                         |          |
|------------------------------------------|-------------------------|----------|
| <b>Sexual behaviors</b>                  |                         |          |
| <b>Sexual partners</b>                   |                         |          |
|                                          | <i>Median (IQR) [n]</i> |          |
| Sexual partners, last 3 months (N=19)    | 12 (5; 21)              |          |
| Sexual partners, last 12 months (N=5)    | 40 (20; 60)             |          |
| <b>Sexual practices</b>                  |                         |          |
|                                          |                         | n (%)    |
| Anal sex (N=23)                          | Unprotected             | 17 (74%) |
|                                          | Protected               | 1 (4%)   |
|                                          | Sometimes               | 5 (22%)  |
| Oral sex (N=25)                          | Unprotected             | 19 (76%) |
|                                          | Protected               | 1 (4%)   |
|                                          | Sometimes               | 5 (20%)  |
| Double penetration (N=11)                | Unprotected             | 9 (82%)  |
|                                          | Sometimes protected     | 2 (18%)  |
| Fisting (N=5)                            | Unprotected             | 4 (80%)  |
|                                          | Sometimes protected     | 1 (20%)  |
| Sexual toys (N=8)                        | Unprotected             | 3 (38%)  |
|                                          | Protected               | 2 (25%)  |
|                                          | Sometimes protected     | 3 (38%)  |
|                                          | Shares sexual toys      | 6 (76%)  |
| <b>Drug use characterization</b>         |                         |          |
| <b>Drug</b>                              |                         |          |
|                                          |                         | n (%)    |
| Cocaine (N=25)                           | 3 (12%)                 |          |
| Ketamine (N=25)                          | 3 (12%)                 |          |
| GHB/GBL (N=25)                           | 23 (92%)                |          |
| Methamphetamine (N=25)                   | 24 (96%)                |          |
| Mephedrone (N=25)                        | 10 (40%)                |          |
| Speed (N=25)                             | 3 (12%)                 |          |
| MDMA (N=25)                              | 4 (16%)                 |          |
| Alkyl nitrites (N=25)                    | 12 (48%)                |          |
| ED agents (N=25)                         | 15 (60%)                |          |
| Cannabis (N=25)                          | 4 (16%)                 |          |
| <b>Route of drug administration</b>      |                         |          |
| Oral (N=24)                              | 19 (79%)                |          |
| Inhaled (N=24)                           | 21 (88%)                |          |
| Snorted (N=24)                           | 7 (29%)                 |          |

|                                                         |          |
|---------------------------------------------------------|----------|
| Sublingual (N=24)                                       | 4 (17%)  |
| Rectal (N=24)                                           | 3 (13%)  |
| Endovenous or <i>slamming</i> (N=24)                    | 12 (46%) |
| Sharing venipuncture material if <i>slamming</i> (N=12) | 1 (8%)   |
| Use of sterile materials if <i>slamming</i> (N=8)       | 8 (73%)  |
| <b>Frequency of drug use</b>                            |          |
| Every day (N=23)                                        | 6 (26%)  |
| Every week (N=23)                                       | 11 (48%) |
| Every month (N=23)                                      | 5 (21%)  |
| < 1 time per month (N=23)                               | 3 (13%)  |
| <b>Number of drugs used</b>                             |          |
| 1 drug (N=25)                                           | 2 (8%)   |
| 2 drugs (N=25)                                          | 15 (60%) |
| Polydrug use* (N=25)                                    | 8 (32%)  |
| * <i>consumption of ≥3 drugs</i>                        |          |
